# Supplementary material
Source: Research Square preprint supplement (doi:10.21203/rs.3.rs-9962983/v1)
Supplement: Supplementary file 1 [file 34c0e16ded9759342ae04cfe.docx]

**Supplementary Tables**

**Table S1**

*Demographic Information, Measure Descriptive Statistics, and Reliability Coefficients (N = 228)*

|  | *N* (%) | Mean (*SD)* | *a* |
| --- | --- | --- | --- |
| Sex |  |  |  |
| Female | 114 (50%) |  |  |
| Male | 114 (50%) |  |  |
| Ethnicity |  |  |  |
| White | 199 (8.73) |  |  |
| Asian / Asian British | 9 (3.9) |  |  |
| Black / Black British | 7 (3.1) |  |  |
| Middle / Near Eastern | 3 (1.3) |  |  |
| Hispanic or Latino | 1 (0.4) |  |  |
| Mixed Ethnicity | 9 (3.9) |  |  |
| Age |  | 30.50 (9.47) |  |
| AQ |  | 33.95 (8.95) | .89 |
| SC |  | 2.17 (0.64) | .93 |
| SK |  | 2.24 (0.82) | .81 |
| SJ |  | 4.08 (0.77) | .79 |
| CH |  | 2.39 (0.90) | .81 |
| IS |  | 4.03 (0.78) | .73 |
| MI |  | 2.61 (0.86) | .79 |
| OI |  | 4.06 (0.80) | .79 |
| CS |  | 2.40 (0.75) | .89 |
| UCS |  | 4.06 (0.67) | .90 |

*Note*. SC = general self-compassion factor; AQ = total autism quotient score; SK = self-kindness; SJ = self-judgment; CH = common humanity; IS = isolation; MI = mindfulness; OI = over-identification; CS = compassionate self-responding; UCS = uncompassionate self-responding.

**Table S2**

*Correlations Between Overall SCS and Subscales (N = 228)*

|  | SC | SK | SJ | CH | IS | MI | UCS |
| --- | --- | --- | --- | --- | --- | --- | --- |
| SC |  |  |  |  |  |  |  |
| SK | .846 |  |  |  |  |  |  |
| SJ | -.795 | -.662 |  |  |  |  |  |
| CH | .794 | .622 | -.452 |  |  |  |  |
| IS | -.712 | -.457 | .530 | -.464 |  |  |  |
| MI | .760 | .628 | -.373 | .703 | -.390 |  |  |
| OI | -.795 | -.535 | .690 | -.491 | .590 | -.480 |  |
| CS |  |  |  |  |  |  | -.644 |

*Note*. All correlations significant at *p* < .001. SC = general self-compassion factor; SK = self-kindness; SJ = self-judgment; CH = common humanity; IS = isolation; MI = mindfulness; OI = over-identification; CS = compassionate self-responding; UCS = uncompassionate self-responding.

**Mplus Syntax Files for ESEM Models**

*Note.* Syntax for Six-factor correlated, two-factor, and single-bifactor models with WLSMV estimation sourced from Neff et al. (2019), with modifications made for ML estimation.

Model 1a: Six-factor correlated ESEM with ML Estimation

Variable: Names are

scsj1 scoi2 scch3 scis4 scsk5 scoi6 scch7 scsj8 scmi9 scch10 scsj11

scsk12 scis13 scmi14 scch15 scsj16 scmi17 scis18 scsk19 scoi20

scsj21 scmi22 scsk23 scoi24 scis25 scsk26;

USEVARIABLES ARE

scsj1 scoi2 scch3 scis4 scsk5 scoi6 scch7 scsj8 scmi9 scch10 scsj11

scsk12 scis13 scmi14 scch15 scsj16 scmi17 scis18 scsk19 scoi20

scsj21 scmi22 scsk23 scoi24 scis25 scsk26;

Analysis:

estimator = ML;

rotation = target;

Model:

sk BY scsk5 scsk12 scsk19 scsk23 scsk26

scsj1~0 scsj8~0 scsj11~0 scsj16~0 scsj21~0

scch3~0 scch7~0 scch10~0 scch15~0

scis4~0 scis13~0 scis18~0 scis25~0

scmi9~0 scmi14~0 scmi17~0 scmi22~0

scoi2~0 scoi6~0 scoi20~0 scoi24~0 (*1);

sj BY scsk5~0 scsk12~0 scsk19~0 scsk23~0 scsk26~0

scsj1 scsj8 scsj11 scsj16 scsj21

scch3~0 scch7~0 scch10~0 scch15~0

scis4~0 scis13~0 scis18~0 scis25~0

scmi9~0 scmi14~0 scmi17~0 scmi22~0

scoi2~0 scoi6~0 scoi20~0 scoi24~0 (*1);

ch BY scsk5~0 scsk12~0 scsk19~0 scsk23~0 scsk26~0

scsj1~0 scsj8~0 scsj11~0 scsj16~0 scsj21~0

scch3 scch7 scch10 scch15

scis4~0 scis13~0 scis18~0 scis25~0

scmi9~0 scmi14~0 scmi17~0 scmi22~0

scoi2~0 scoi6~0 scoi20~0 scoi24~0 (*1);

is BY scsk5~0 scsk12~0 scsk19~0 scsk23~0 scsk26~0

scsj1~0 scsj8~0 scsj11~0 scsj16~0 scsj21~0

scch3~0 scch7~0 scch10~0 scch15~0

scis4 scis13 scis18 scis25

scmi9~0 scmi14~0 scmi17~0 scmi22~0

scoi2~0 scoi6~0 scoi20~0 scoi24~0 (*1);

mi BY scsk5~0 scsk12~0 scsk19~0 scsk23~0 scsk26~0

scsj1~0 scsj8~0 scsj11~0 scsj16~0 scsj21~0

scch3~0 scch7~0 scch10~0 scch15~0

scis4~0 scis13~0 scis18~0 scis25~0

scmi9 scmi14 scmi17 scmi22

scoi2~0 scoi6~0 scoi20~0 scoi24~0 (*1);

oi BY scsk5~0 scsk12~0 scsk19~0 scsk23~0 scsk26~0

scsj1~0 scsj8~0 scsj11~0 scsj16~0 scsj21~0

scch3~0 scch7~0 scch10~0 scch15~0

scis4~0 scis13~0 scis18~0 scis25~0

scmi9~0 scmi14~0 scmi17~0 scmi22~0

scoi2 scoi6 scoi20 scoi24 (*1);

Model 1b: Six-factor correlated ESEM with WLSMV Estimation

Variable: Names are

scsj1 scoi2 scch3 scis4 scsk5 scoi6 scch7 scsj8 scmi9 scch10 scsj11

scsk12 scis13 scmi14 scch15 scsj16 scmi17 scis18 scsk19 scoi20

scsj21 scmi22 scsk23 scoi24 scis25 scsk26;

USEVARIABLES ARE

scsj1 scoi2 scch3 scis4 scsk5 scoi6 scch7 scsj8 scmi9 scch10 scsj11

scsk12 scis13 scmi14 scch15 scsj16 scmi17 scis18 scsk19 scoi20

scsj21 scmi22 scsk23 scoi24 scis25 scsk26;

CATEGORICAL ARE all;

Analysis:

estimator = wlsmv;

rotation = target;

Model:

sk BY scsk5 scsk12 scsk19 scsk23 scsk26

scsj1~0 scsj8~0 scsj11~0 scsj16~0 scsj21~0

scch3~0 scch7~0 scch10~0 scch15~0

scis4~0 scis13~0 scis18~0 scis25~0

scmi9~0 scmi14~0 scmi17~0 scmi22~0

scoi2~0 scoi6~0 scoi20~0 scoi24~0 (*1);

sj BY scsk5~0 scsk12~0 scsk19~0 scsk23~0 scsk26~0

scsj1 scsj8 scsj11 scsj16 scsj21

scch3~0 scch7~0 scch10~0 scch15~0

scis4~0 scis13~0 scis18~0 scis25~0

scmi9~0 scmi14~0 scmi17~0 scmi22~0

scoi2~0 scoi6~0 scoi20~0 scoi24~0 (*1);

ch BY scsk5~0 scsk12~0 scsk19~0 scsk23~0 scsk26~0

scsj1~0 scsj8~0 scsj11~0 scsj16~0 scsj21~0

scch3 scch7 scch10 scch15

scis4~0 scis13~0 scis18~0 scis25~0

scmi9~0 scmi14~0 scmi17~0 scmi22~0

scoi2~0 scoi6~0 scoi20~0 scoi24~0 (*1);

is BY scsk5~0 scsk12~0 scsk19~0 scsk23~0 scsk26~0

scsj1~0 scsj8~0 scsj11~0 scsj16~0 scsj21~0

scch3~0 scch7~0 scch10~0 scch15~0

scis4 scis13 scis18 scis25

scmi9~0 scmi14~0 scmi17~0 scmi22~0

scoi2~0 scoi6~0 scoi20~0 scoi24~0 (*1);

mi BY scsk5~0 scsk12~0 scsk19~0 scsk23~0 scsk26~0

scsj1~0 scsj8~0 scsj11~0 scsj16~0 scsj21~0

scch3~0 scch7~0 scch10~0 scch15~0

scis4~0 scis13~0 scis18~0 scis25~0

scmi9 scmi14 scmi17 scmi22

scoi2~0 scoi6~0 scoi20~0 scoi24~0 (*1);

oi BY scsk5~0 scsk12~0 scsk19~0 scsk23~0 scsk26~0

scsj1~0 scsj8~0 scsj11~0 scsj16~0 scsj21~0

scch3~0 scch7~0 scch10~0 scch15~0

scis4~0 scis13~0 scis18~0 scis25~0

scmi9~0 scmi14~0 scmi17~0 scmi22~0

scoi2 scoi6 scoi20 scoi24 (*1);

Model 2a: Two-factor ESEM with ML Estimation

Variable: Names are

scsj1 scoi2 scch3 scis4 scsk5 scoi6 scch7 scsj8 scmi9 scch10 scsj11

scsk12 scis13 scmi14 scch15 scsj16 scmi17 scis18 scsk19 scoi20

scsj21 scmi22 scsk23 scoi24 scis25 scsk26;

USEVARIABLES ARE

scsj1 scoi2 scch3 scis4 scsk5 scoi6 scch7 scsj8 scmi9 scch10 scsj11

scsk12 scis13 scmi14 scch15 scsj16 scmi17 scis18 scsk19 scoi20

scsj21 scmi22 scsk23 scoi24 scis25 scsk26;

Analysis:

estimator = ml;

rotation = target;

MODEL:

pos BY scsk5 scsk12 scsk19 scsk23 scsk26

scsj1~0 scsj8~0 scsj11~0 scsj16~0 scsj21~0

scch3 scch7 scch10 scch15

scis4~0 scis13~0 scis18~0 scis25~0

scmi9 scmi14 scmi17 scmi22

scoi2~0 scoi6~0 scoi20~0 scoi24~0 (*1);

neg BY scsk5~0 scsk12~0 scsk19~0 scsk23~0 scsk26~0

scsj1 scsj8 scsj11 scsj16 scsj21

scch3~0 scch7~0 scch10~0 scch15~0

scis4 scis13 scis18 scis25

scmi9~0 scmi14~0 scmi17~0 scmi22~0

scoi2 scoi6 scoi20 scoi24 (*1);

Model 2b: Two-factor ESEM with WLSMV Estimation

Variable: Names are

scsj1 scoi2 scch3 scis4 scsk5 scoi6 scch7 scsj8 scmi9 scch10 scsj11

scsk12 scis13 scmi14 scch15 scsj16 scmi17 scis18 scsk19 scoi20

scsj21 scmi22 scsk23 scoi24 scis25 scsk26;

USEVARIABLES ARE

scsj1 scoi2 scch3 scis4 scsk5 scoi6 scch7 scsj8 scmi9 scch10 scsj11

scsk12 scis13 scmi14 scch15 scsj16 scmi17 scis18 scsk19 scoi20

scsj21 scmi22 scsk23 scoi24 scis25 scsk26;

CATEGORICAL ARE all;

Analysis:

estimator = wlsmv;

rotation = target;

MODEL:

pos BY scsk5 scsk12 scsk19 scsk23 scsk26

scsj1~0 scsj8~0 scsj11~0 scsj16~0 scsj21~0

scch3 scch7 scch10 scch15

scis4~0 scis13~0 scis18~0 scis25~0

scmi9 scmi14 scmi17 scmi22

scoi2~0 scoi6~0 scoi20~0 scoi24~0 (*1);

neg BY scsk5~0 scsk12~0 scsk19~0 scsk23~0 scsk26~0

scsj1 scsj8 scsj11 scsj16 scsj21

scch3~0 scch7~0 scch10~0 scch15~0

scis4 scis13 scis18 scis25

scmi9~0 scmi14~0 scmi17~0 scmi22~0

scoi2 scoi6 scoi20 scoi24 (*1);

Model 3a: Single-bifactor ESEM with ML Estimation

Variable: Names are

scsj1 scoi2 scch3 scis4 scsk5 scoi6 scch7 scsj8 scmi9 scch10 scsj11

scsk12 scis13 scmi14 scch15 scsj16 scmi17 scis18 scsk19 scoi20

scsj21 scmi22 scsk23 scoi24 scis25 scsk26;

USEVARIABLES ARE

scsj1 scoi2 scch3 scis4 scsk5 scoi6 scch7 scsj8 scmi9 scch10 scsj11

scsk12 scis13 scmi14 scch15 scsj16 scmi17 scis18 scsk19 scoi20

scsj21 scmi22 scsk23 scoi24 scis25 scsk26;

Analysis:

estimator = ml;

rotation = target (orthogonal);

MODEL:

sc BY scsk5 scsk12 scsk19 scsk23 scsk26 scsj1 scsj8 scsj11 scsj16

scsj21 scch3 scch7 scch10 scch15 scis4 scis13 scis18 scis25

scmi9 scmi14 scmi17 scmi22 scoi2 scoi6 scoi20 scoi24 (*1);

MODEL:

sk BY scsk5 scsk12 scsk19 scsk23 scsk26

scsj1~0 scsj8~0 scsj11~0 scsj16~0 scsj21~0

scch3~0 scch7~0 scch10~0 scch15~0

scis4~0 scis13~0 scis18~0 scis25~0

scmi9~0 scmi14~0 scmi17~0 scmi22~0

scoi2~0 scoi6~0 scoi20~0 scoi24~0 (*1);

sj BY scsk5~0 scsk12~0 scsk19~0 scsk23~0 scsk26~0

scsj1 scsj8 scsj11 scsj16 scsj21

scch3~0 scch7~0 scch10~0 scch15~0

scis4~0 scis13~0 scis18~0 scis25~0

scmi9~0 scmi14~0 scmi17~0 scmi22~0

scoi2~0 scoi6~0 scoi20~0 scoi24~0 (*1);

ch BY scsk5~0 scsk12~0 scsk19~0 scsk23~0 scsk26~0

scsj1~0 scsj8~0 scsj11~0 scsj16~0 scsj21~0

scch3 scch7 scch10 scch15

scis4~0 scis13~0 scis18~0 scis25~0

scmi9~0 scmi14~0 scmi17~0 scmi22~0

scoi2~0 scoi6~0 scoi20~0 scoi24~0 (*1);

is BY scsk5~0 scsk12~0 scsk19~0 scsk23~0 scsk26~0

scsj1~0 scsj8~0 scsj11~0 scsj16~0 scsj21~0

scch3~0 scch7~0 scch10~0 scch15~0

scis4 scis13 scis18 scis25

scmi9~0 scmi14~0 scmi17~0 scmi22~0

scoi2~0 scoi6~0 scoi20~0 scoi24~0 (*1);

mi BY scsk5~0 scsk12~0 scsk19~0 scsk23~0 scsk26~0

scsj1~0 scsj8~0 scsj11~0 scsj16~0 scsj21~0

scch3~0 scch7~0 scch10~0 scch15~0

scis4~0 scis13~0 scis18~0 scis25~0

scmi9 scmi14 scmi17 scmi22

scoi2~0 scoi6~0 scoi20~0 scoi24~0 (*1);

oi BY scsk5~0 scsk12~0 scsk19~0 scsk23~0 scsk26~0

scsj1~0 scsj8~0 scsj11~0 scsj16~0 scsj21~0

scch3~0 scch7~0 scch10~0 scch15~0

scis4~0 scis13~0 scis18~0 scis25~0

scmi9~0 scmi14~0 scmi17~0 scmi22~0

scoi2 scoi6 scoi20 scoi24 (*1);

Model 3b: Single-bifactor ESEM with WLSMV Estimation

Variable: Names are

scsj1 scoi2 scch3 scis4 scsk5 scoi6 scch7 scsj8 scmi9 scch10 scsj11

scsk12 scis13 scmi14 scch15 scsj16 scmi17 scis18 scsk19 scoi20

scsj21 scmi22 scsk23 scoi24 scis25 scsk26;

USEVARIABLES ARE

scsj1 scoi2 scch3 scis4 scsk5 scoi6 scch7 scsj8 scmi9 scch10 scsj11

scsk12 scis13 scmi14 scch15 scsj16 scmi17 scis18 scsk19 scoi20

scsj21 scmi22 scsk23 scoi24 scis25 scsk26;

CATEGORICAL ARE all;

Analysis:

estimator = wlsmv;

rotation = target (orthogonal);

MODEL:

sc BY scsk5 scsk12 scsk19 scsk23 scsk26 scsj1 scsj8 scsj11 scsj16

scsj21 scch3 scch7 scch10 scch15 scis4 scis13 scis18 scis25

scmi9 scmi14 scmi17 scmi22 scoi2 scoi6 scoi20 scoi24 (*1);

MODEL:

sk BY scsk5 scsk12 scsk19 scsk23 scsk26

scsj1~0 scsj8~0 scsj11~0 scsj16~0 scsj21~0

scch3~0 scch7~0 scch10~0 scch15~0

scis4~0 scis13~0 scis18~0 scis25~0

scmi9~0 scmi14~0 scmi17~0 scmi22~0

scoi2~0 scoi6~0 scoi20~0 scoi24~0 (*1);

sj BY scsk5~0 scsk12~0 scsk19~0 scsk23~0 scsk26~0

scsj1 scsj8 scsj11 scsj16 scsj21

scch3~0 scch7~0 scch10~0 scch15~0

scis4~0 scis13~0 scis18~0 scis25~0

scmi9~0 scmi14~0 scmi17~0 scmi22~0

scoi2~0 scoi6~0 scoi20~0 scoi24~0 (*1);

ch BY scsk5~0 scsk12~0 scsk19~0 scsk23~0 scsk26~0

scsj1~0 scsj8~0 scsj11~0 scsj16~0 scsj21~0

scch3 scch7 scch10 scch15

scis4~0 scis13~0 scis18~0 scis25~0

scmi9~0 scmi14~0 scmi17~0 scmi22~0

scoi2~0 scoi6~0 scoi20~0 scoi24~0 (*1);

is BY scsk5~0 scsk12~0 scsk19~0 scsk23~0 scsk26~0

scsj1~0 scsj8~0 scsj11~0 scsj16~0 scsj21~0

scch3~0 scch7~0 scch10~0 scch15~0

scis4 scis13 scis18 scis25

scmi9~0 scmi14~0 scmi17~0 scmi22~0

scoi2~0 scoi6~0 scoi20~0 scoi24~0 (*1);

mi BY scsk5~0 scsk12~0 scsk19~0 scsk23~0 scsk26~0

scsj1~0 scsj8~0 scsj11~0 scsj16~0 scsj21~0

scch3~0 scch7~0 scch10~0 scch15~0

scis4~0 scis13~0 scis18~0 scis25~0

scmi9 scmi14 scmi17 scmi22

scoi2~0 scoi6~0 scoi20~0 scoi24~0 (*1);

oi BY scsk5~0 scsk12~0 scsk19~0 scsk23~0 scsk26~0

scsj1~0 scsj8~0 scsj11~0 scsj16~0 scsj21~0

scch3~0 scch7~0 scch10~0 scch15~0

scis4~0 scis13~0 scis18~0 scis25~0

scmi9~0 scmi14~0 scmi17~0 scmi22~0

scoi2 scoi6 scoi20 scoi24 (*1);
